# Supplementary material for: Climate variability and corn yield in Argentina: the role of El Niño–Southern Oscillation index and other climate drivers
Source: Research Square preprint supplement (doi:10.21203/rs.3.rs-6269402/v1), 2025-04-21
Supplement: Supplementary file 1 [file 420567c3b0d367840f623f7f.docx]

**Supplementary materials**

**Table 1**: Spatial distribution of correlation values between the climate indices Indian Ocean Dipole (IOD), Antarctic Oscillation (AAO), South Atlantic Ocean Anomaly (TSA), and Oceanic Niño Index (ONI) and maize yield anomalies across the study area.
